# Supplementary material for: Impact of aging on host immune response and survival in melanoma: an analysis of 3 patient cohorts
Source: J Transl Med. 2016 Oct 19;14:299. doi: 10.1186/s12967-016-1026-2 (PMC5070187; doi:10.1186/s12967-016-1026-2)
Supplement: Supplementary file 2 — Additional file 2: Table S2. Clinicopathologic features of 84 IMCG and 43 TCGA primary melanomas in gene expression analysis. [file 12967_2016_1026_MOESM2_ESM.xlsx]

## Sheet: Sheet1
Table S2: Clinicopathologic features of 84 IMCG and 43 TCGA primary melanomas in gene expression analysis
		IMCG (n=84)		TCGA (n=43)
		#	%	#	%
Gender	Male	48	57	28	65
	Female	36	43	15	35
Age	<45	21	25	5	12
	46-65	21	25	20	46
	>65	42	50	18	42
Thickness	<2 mm	9	11	2	5
	2.01-4 mm	33	39	2	5
	>4 mm	42	50	29	67
	Unknown	-	-	10	23
Ulceration	Absent	33	39	6	14
	Present	51	61	35	81
	Unknown	-	-	2	5
TILS	Absent	19	23	-	-
	Non-brisk	31	37	-	-
	Brisk	33	39	-	-
	LScore 0	-	-	21	49
	LScore 2	-	-	10	23
	LScore 3-6	-	-	12	28
